# Supplementary material
Source: PubMed Central journal article supplement (PMC7068828)
Supplement: rccm.201903-0692OC_wang_data_supplement.pdf [file rccm.201903-0692OC_wang_data_supplement.pdf]

# Effect of Weight Loss on Upper Airway Anatomy and the Apnea Hypopnea Index: The Importance of Tongue Fat

Stephen H. Wang, B.A., Brendan T. Keenan, M.S., Andrew Wiemken, M.P.H., Yinyin Zang, Ph.D., Bethany Staley, R.P.S.G.T., C.R.C., David B. Sarwer, Ph.D, Drew A Torigian, M.D., M.A., Noel Williams, M.B.Ch.B, M.D., Allan I. Pack, M.B.Ch.B., Ph.D, Richard J Schwab, M.D.

## ONLINE SUPPLEMENT

|                                                                                                             |       |
|-------------------------------------------------------------------------------------------------------------|-------|
| <b>Supplemental Methods</b> .....                                                                           | 1-6   |
| <b>Supplemental Results</b> .....                                                                           | 7-9   |
| <b>Figure E1:</b> Illustration of hypothesized single and multiple mediation models.....                    | 10    |
| <b>Table E1:</b> Intraclass Correlation Coefficients for MRI Variables Among a Weight Stable Population.... | 11    |
| <b>Table E2:</b> Correlations with Absolute Change in Weight among Patients with OSA.....                   | 12    |
| <b>E2A:</b> Absolute Change in Airway Sizes .....                                                           | 12    |
| <b>E2B:</b> Absolute Change in Soft Tissue Volumes.....                                                     | 12    |
| <b>E2C:</b> Absolute Change in Abdominal Fat Volumes .....                                                  | 12    |
| <b>Table E3:</b> Percent Changes in Patients with OSA based on weight change.....                           | 13    |
| <b>E3A:</b> Airway Sizes .....                                                                              | 13    |
| <b>E3B:</b> Soft Tissue Volumes.....                                                                        | 13    |
| <b>E3C:</b> Abdominal Fat Volumes .....                                                                     | 13    |
| <b>Table E4:</b> Absolute Changes in Patients with OSA based on weight change .....                         | 14    |
| <b>E4A:</b> Airway Sizes .....                                                                              | 14    |
| <b>E4B:</b> Soft Tissue Volumes.....                                                                        | 14    |
| <b>E4C:</b> Abdominal Fat Volumes .....                                                                     | 14    |
| <b>Table E5:</b> Correlations with Absolute Change in AHI among Patients with OSA.....                      | 15-16 |
| <b>E5A:</b> Absolute Change in Airway Sizes .....                                                           | 15    |
| <b>E5B:</b> Absolute Change in Soft Tissue Volumes.....                                                     | 15    |
| <b>E5C:</b> Absolute Change in Abdominal Fat Volumes .....                                                  | 16    |
| <b>Table E6:</b> Correlations with Percent Change in Positional AHI among Patients with OSA...              | 16-17 |
| <b>E6A:</b> Percent Change in Airway Sizes .....                                                            | 16    |
| <b>E6B:</b> Percent Change in Soft Tissue Volumes .....                                                     | 17    |
| <b>E6C:</b> Percent Change in Abdominal Fat Volumes.....                                                    | 17    |
| <b>Supplemental References</b> .....                                                                        | 18    |

## **SUPPLEMENTAL METHODS**

### **Subjects**

The study used a prospective design of persons with obesity and sleep apnea and who presented for either bariatric surgery or a lifestyle modification intervention for their obesity. Study participants were recruited from the Penn Center for Sleep Disorders outpatient practice and from patients seeking weight-loss treatment at the University of Pennsylvania's Bariatric Surgery Program or a lifestyle modification intervention at the Center for Weight and Eating Disorders. The study was approved by the University of Pennsylvania Institutional Review Board for human studies (protocols 808496 and 809398), and written informed consent was obtained from all participants. All participants were greater than 18 years old and had an apnea-hypopnea index (AHI)  $\geq 10$  events/hour as determined by polysomnography which were the criteria used in our previous study examining tongue fat in controls and apneics without weight loss (E1). Exclusion criteria included inability to undergo upper airway and abdominal magnetic resonance imaging (MRI) or pregnancy. Participants underwent an MRI and in-laboratory sleep study before beginning weight loss treatment. Participants returned after 6 months for a follow-up MRI and in-laboratory sleep study.

### **Medical and Surgical Weight Loss Protocols**

Participants undergoing a lifestyle modification program for weight loss (n=49) or bariatric surgery (n=18) were invited to participate. Patients undergoing bariatric surgery had gastric sleeve procedure (n=8), gastric bypass (Roux-en-Y) (n=9) or gastric banding (n=1). The lifestyle modification program was based upon the Diabetes Prevention Program and designed to promote a weight loss of 5-10% of initial body weight through caloric restriction, increased physical activity, and behavioral modification strategies (E2). The calorie goals were 1200-1500 kcal/day for those who weighed <250 pounds, and 1500-1800 kcal/day for those whose weight exceeded 250 pounds. Dietary composition was

aligned with that recommended by the NHLBI guidelines on the treatment of obesity (E2) and included recommendations to consume <7% saturated fat, <10% polyunsaturated fat, <20% monounsaturated fats, 25-30% total fat, 50-60% carbohydrates, and 15% protein. Participants were prescribed a program of physical activity consisting of walking 4 times per week, starting at 10 minutes per session and building to 30 minutes per session over a 12-week period. Participants had 30-minute individual sessions with a registered dietitian with extensive experience in behavioral weight control counseling. Each patient received 24 weekly individual counseling sessions during the 6-month treatment period. Participants were instructed on how to comply with the dietary prescription and in traditional behavioral methods of weight control such as self-monitoring, stimulus control, slow eating, and related behaviors.

### **Magnetic Resonance Imaging (MRI)**

Upper airway and abdominal MRI studies were acquired using a 1.5 Tesla MAGNETOM Espree scanner (Siemens Medical Systems, Malvern, PA), as described in our previous publications (E1, E3-5). Three different imaging sequences were utilized as reported in our previous publications: 1) T1-weighted spin echo imaging (for airway and surrounding upper airway soft tissue structures) (E3, E5); 2) Dixon imaging for tongue fat measurements (E1); and 3) T1-weighted gradient recalled echo imaging for abdominal fat imaging (E4).

### **Analysis of the Upper Airway, Surrounding Soft Tissue Structures and Abdominal Fat**

The MRI analysis was performed twice (baseline and after 6 months) and split into 3 different domains: 1) *upper airway analysis* (airway volume, average cross-sectional area, minimum airway area, minimum anterior-posterior distance and minimum lateral distance) in the retropalatal (RP) and retroglottal (RG) regions; 2) *volumetric analysis of the upper airway soft tissues structures* (tongue, tongue fat, soft palate, parapharyngeal fat pads, lateral walls, pterygoids, epiglottis, and combined soft tissue volume [equal to the sum of these structures]); and 3) *abdominal fat volumes* (total, subcutaneous

and visceral). As previously described, Amira 4.1.2 image analysis software (Visage Imaging, San Diego, CA), was utilized to quantify the upper airway, the surrounding soft tissue structures (E1, E5, E6), tongue fat (1) and abdominal subcutaneous/visceral fat (E4). Amira is a software program that allows the technician to segment the upper airway soft tissues structures using thresholding based on grayscale of the specific tissue (tongue, pharyngeal lateral walls, parapharyngeal fat pads, etc). Amira requires the technician to outline the pharyngeal structures. The technician was blinded to the pre-post-weight loss status of the patients and performed the analysis in the same manner in each subject. We have shown that our upper airway soft tissue and tongue fat analysis measurements are reproducible and accurate (E1, E5). Accuracy of our fat volume estimates have been assessed previously (E1) by performing Dixon MRI of a hamburger and steak before and after injection of a known volume of fat (lard) into the tissue (6 cc added to the steak and 3 cc added to the hamburger) and comparing the results to the known quantity.

Although fat-weighted Dixon images provide a reproducible objective measure adipose tissue, the boundaries of soft tissues with Dixon imaging are not as distinct in comparison to the standard spin-echo images (E1). Therefore the boundaries of the tongue on each MR axial slice was determined on standard axial T1 spin-echo MR images, and then superimposed onto the axial Dixon fat-only MR images in order to select all fat within that region.. The grayscale setting to segment tongue fat was chosen based on the grayscale intensity of the surrounding subcutaneous and neck fat allowing us to standardize the tongue fat intensity across all subjects (E1). We have shown that this analysis technique for tongue fat is highly reproducible (E1). The technician performing these MRI analyses was blinded to polysomnography results and the pre-post weight loss state of each subject.

### **Reproducibility Assessment**

To understand the reproducibility of MRI analyses, we compared measurements quantified from MRIs performed 6 months apart in an available sample of 17 individuals (n=13 OSA, 4 non-OSA) that were weight stable over the follow-up period (defined as follow-up weight within 2.5% of baseline weight). Using these repeated measurements, we calculated the intraclass correlation coefficient (ICC) for each of our anatomy measures of interest. As suggested by Landis and Koch (E7), ICC value ranges can be used to qualitatively assess level of reproducibility as *poor* (<0.00), *slight* (0.00-0.20), *fair* (0.21-0.40), *moderate* (0.41-0.60), *substantial* (0.61-0.80) and *almost perfect* (0.81-1.00).

### **Statistical Analysis**

Data are summarized using means and standard deviations (continuous) or frequencies and percentages (categorical). To summarize changes over the follow-up period, we calculated subject-specific percentage and absolute change scores as follow-up minus baseline values. Primary analyses examining the relationship between weight loss and anatomic changes were performed using Pearson's correlations, unadjusted and controlling for relevant baseline covariates (age, sex, race, height and AHI). Associations between change in upper airway anatomy (or weight) and change in AHI were performed in a similar manner. These analyses were performed unadjusted, controlling for clinical covariates, and further adjusted for percentage change in weight to assess whether individual structures were associated with changes in AHI independent of change in weight. As a complementary analysis, we also quantified and compared change scores in patients that lost at least 2.5% weight and those that were stable or gained weight. Comparisons between groups were performed using T-tests or linear regression models with and without covariate adjustment. In addition to the above covariates, baseline values of the variable of interest were included in models comparing absolute change between groups. Significance of within group changes were assessed with paired T-tests. Where presented, statistical comparisons of

correlation coefficients were performed by deriving a non-parametric p-value based on the observed distribution of differences in correlations from 1,000 bootstrapped samples (E8, E9).

To test whether associations between percent weight change and percent AHI improvements are mediated by specific upper airway or soft tissue anatomy percent changes, we utilized mediation modeling (E10). Mediation analyses were conducted by PROCESS, a conditional process modeling program that utilizes an ordinary least squares path analytical framework to test for both direct and indirect effects (E11). To comprehensively examine upper airway mediators, we first tested all putative mediators individually using single mediator models. Based on the results of these single mediator models, we then created a combined, parallel multiple mediator model including any significant individual mediators to examine the most influential mediators in the presence of all possible mediators (see **Figure S1** for hypothesized mediation models). Bias-corrected 95% confidence intervals (CIs) were estimated using bootstrapping (n=5000 samples) to verify indirect (mediating) effects; estimates are presented unstandardized and standardized (to allow direct comparison of indirect effects across proposed mediators). The indirect effect was considered significant and mediation demonstrated if this confidence interval did not contain zero. (E10, E12). This approach computes more accurate confidence intervals of indirect effects than other commonly used methods (E10) and provides higher power while maintaining control over the Type I error rate (E13). Baseline age, sex, race, and height were controlled for all mediation models.

We utilized a domain-specific Hochberg correction (E14-16) to control for multiple comparisons when determining statistical significance of associations with individual upper airway anatomical measures. As described by Hochberg and Benjamini (E15), for a given set of  $m$  hypotheses:

*This procedure starts by examining the largest p-value  $P_{(m)}$ . If  $P_{(m)} \leq \alpha$ , then  $H_{(m)}$  and all other hypotheses are rejected. If not,  $H_{(m)}$  is not rejected and one proceeds to compare  $P_{(m-1)}$  with  $\alpha/2$ .*

*If the former is smaller, then  $H_{(m-1)}$  and all hypotheses with smaller  $p$ -values are rejected. Generally, one proceeds from highest to lower  $p$ -values, retaining  $H_{(i)}$  if its  $p$ -value satisfies  $P_{(i)} > \alpha/(m - i + 1)$ . One stops the procedure at the first ordered hypothesis when that inequality is reversed. This hypothesis is rejected and so are all hypotheses with lower or equal  $p$ -values.*

In addition to this approach for determining statistically significant results, any unadjusted  $p < 0.05$  was considered nominally significant evidence. Significance in multivariate models was assessed using the confidence interval approach, detailed above. Analyses were conducted using Stata, Version 14 (StataCorp LP, College Station, TX), SAS Software Version 9.4 (SAS Institute Inc., Cary, NC) and SPSS 24 (IBM Corp., Armonk, NY).

Our sample size of 67 apneics provided adequate power (80%) for detecting correlations of 0.34 at a nominal level of significance ( $p < 0.05$ ). Similarly, in analyses comparing apneics who lost weight ( $n=47$ ) to those who were weight stable or gained weight ( $n=20$ ), we had at least 80% power to detect standardized differences of 0.76. These correspond to moderate or large effects as defined by Cohen (E17). Thus, the study was powered for meaningful effect sizes. Non-significant associations for smaller effect sizes should be interpreted with some caution, as it is possible that these represent real associations that the current sample is underpowered to declare significant (e.g., false negatives).

## SUPPLEMENTAL RESULTS

### Patient characteristics of weight loss groups

Demographic characteristics of the sample are shown in **Table 1**. Forty-seven (70.1%) patients lost  $\geq 2.5\%$  body weight (average change  $-14.5 \pm 8.5\%$  [ $p < 0.0001$ ]), compared to 20 (29.9%) that were weight stable or gained weight (average change  $2.3 \pm 4.5\%$  [ $p = 0.036$ ]). Patients who lost weight had a significant AHI reduction ( $-23.3 \pm 21.9$ ;  $p < 0.0001$ ), compared to no change in those that did not ( $p = 0.856$ ).

### Comparison of weight loss interventions

All participant in the bariatric surgery arm ( $n = 18$ ) lost at least 2.5% body weight, while in those undergoing lifestyle modification a total of 29 (59.2%) lost at least 2.5% body weight and 20 (40.8%) were weight stable or gained weight. Among participants that lost weight, those that underwent bariatric surgery had greater weight loss than those that underwent intensive lifestyle modification ( $-19.2 \pm 6.8\%$  vs.  $-11.6 \pm 8.2\%$ ,  $p = 0.002$ ). Relatedly, there was greater improvement in AHI among patients who lost weight with bariatric surgery than those who lost weight with intensive lifestyle modification ( $-73.8 \pm 17.8\%$  vs.  $-49.6 \pm 36.5\%$ ,  $p = 0.004$ ).

### Changes in Upper Airway Anatomy in Weight Loss and Weight Stable/Gain Patients

#### *Airway Sizes*

Secondary comparisons of percent changes in airway size between weight loss and weight stable/gain patients are shown in **Table S3A**. Patients who lost  $\geq 2.5\%$  weight showed increased retropalatal airway volume ( $p = 0.007$ ), cross-sectional area ( $p = 0.001$ ), minimum area ( $p = 0.003$ ) and minimum lateral distance ( $p = 0.001$ ), as well as a large increase in retroglossal minimum area ( $p = 0.001$ ). After covariate adjustment, differences in the percentage changes in the RP minimum lateral distance ( $p = 0.020$ ) and RG minimum area ( $p = 0.023$ ) were nominally different between weight loss groups



(**Table S3A**). Similar results were observed when comparing absolute changes (**Table S4A**), although the increased RG minimum area was nominal ( $p=0.032$ ) among the weight loss group. There was also a significant absolute decrease in RP minimum AP distance ( $p=0.003$ ) among the weight loss group. After adjustment, differences in RP minimum AP ( $p=0.022$ ) and lateral ( $p=0.033$ ) distance remained nominally different between groups.

### ***Soft Tissue Volumes***

Supporting results observed in correlational analysis, most soft tissue measures showed significant decreases in volume among patients with OSA who lost weight (**Table S3B**), including combined soft tissue ( $p<0.0001$ ), genioglossus ( $p=0.001$ ), tongue fat ( $p<0.0001$ ), total tongue ( $p=0.009$ ), fat pads ( $p<0.0001$ ), pterygoid ( $p<0.0001$ ), RP lateral walls ( $p<0.0001$ ) and total lateral walls ( $p<0.0001$ ). Compared to patients without weight loss, there were significant differences in the change in tongue fat volume ( $p<0.0001$ ), pterygoid volume ( $p=0.001$ ) and total lateral wall volume ( $p=0.001$ ). Differences remained significant controlling for covariates (**Table S3B**). Similar results were observed for absolute changes (**Tables S4B**); in adjusted analyses, we also observed a significant difference in the absolute change in fat pad volume between groups ( $p=0.004$ ).

### ***Abdominal Fat Volumes***

Among patients who lost  $\geq 2.5\%$  weight, there were large percentage reductions in each measurement (**Table S3C**), compared to no significant changes in those who did not lose weight. Differences between groups were statistically significant in adjusted analyses. Similar results were seen for absolute changes (**Table S4C**), with significant differences between groups in adjusted analysis.

### **Associations between Changes in Tongue Fat and Abdominal Fat**

Given correlations between percent change in weight and percent changes in tongue and abdominal fat volumes, we assessed the correlations between tongue and abdominal fat changes. In

covariate adjusted analyses, percentage change in tongue fat was positively associated with percentage changes in total (partial rho = 0.48, p=0.005), subcutaneous (partial rho = 0.40, p=0.021), and visceral (partial rho = 0.55, p=0.0009) fat volumes. Correlations between the percentage changes in tongue fat and both total abdominal fat (p=0.034) and subcutaneous abdominal fat (p=0.026), but not visceral abdominal fat (p=0.154), were smaller than the correlation between percentage changes in tongue fat and weight. Thus, there is some evidence of a stronger relationship of percent changes in tongue fat with changes in weight.

**Figure E1.** Illustration of hypothesized single and multiple mediation models. The hypothesized mediation models examined through conditional process analysis are illustrated. In particular, the direct effect of percent change in weight on percentage change in AHI (*path c*) is shown in the top schematic. The middle schematic shows the evaluated single mediator model of mediation by an individual upper airway variable, including the relationship between weight percent change and anatomy (*path a*), between anatomy and percentage change in AHI (*path b*) and the remaining direct effect of weight percent change on AHI percent change (*path c'*). Finally, the single mediator model is extended to show the hypothesized multiple mediator model, including  $N$  single mediators with specific individual  $a_N$  and  $b_N$  path effects.

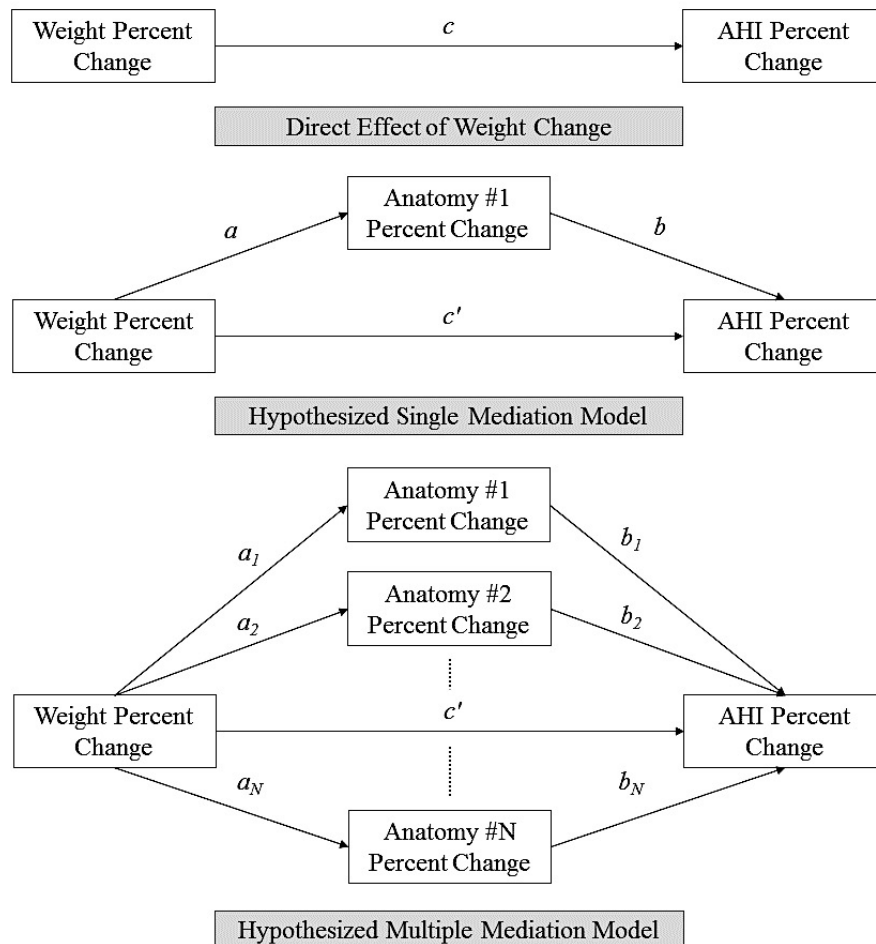

**Table E1:** Intraclass Correlation Coefficients for MRI Variables Among a Weight Stable Population

| Measure                           | Weight Stable Participants |                  |
|-----------------------------------|----------------------------|------------------|
|                                   | N                          | ICC <sup>†</sup> |
| RP Airway Volume                  | 17                         | 0.777            |
| RP Cross Sectional Area           | 17                         | 0.808            |
| RP Minimum Area                   | 17                         | 0.935            |
| RP Minimum AP Distance            | 17                         | 0.701            |
| RP Minimum Lateral Distance       | 17                         | 0.889            |
| RG Airway Volume                  | 14                         | 0.844            |
| RG Cross Sectional Area           | 14                         | 0.856            |
| RG Minimum Area                   | 15                         | 0.849            |
| RG Minimum AP Distance            | 15                         | 0.746            |
| RG Minimum Lateral Distance       | 15                         | 0.829            |
| Total Soft Tissue Volume          | 17                         | 0.944            |
| Soft Palate Volume                | 17                         | 0.779            |
| Genioglossus Volume               | 17                         | 0.922            |
| Other Tongue Volume               | 17                         | 0.721            |
| Tongue Fat Volume                 | 11                         | 0.979            |
| Total Tongue Volume               | 17                         | 0.946            |
| Epiglottis Volume                 | 17                         | 0.750            |
| Fat Pads Volume                   | 17                         | 0.353            |
| Pterygoid Volume                  | 17                         | 0.694            |
| RP Lateral Walls Volume           | 17                         | 0.911            |
| RG Lateral Walls Volume           | 17                         | 0.758            |
| Total Lateral Walls Volume        | 17                         | 0.910            |
| Abdominal Total Fat Volume        | 14                         | 0.489            |
| Abdominal Subcutaneous Fat Volume | 14                         | 0.536            |
| Abdominal Visceral Fat Volume     | 14                         | 0.751            |

<sup>†</sup>Intraclass correlation coefficient (ICC) presented as a measure of reproducibility of the indicated measure over time among weight stable individuals; As suggested by Landis and Koch (23), ICC value ranges can be used to qualitatively assess level of agreement as *poor* (<0.00), *slight* (0.00-0.20), *fair* (0.21-0.40), *moderate* (0.41-0.60), *substantial* (0.61-0.80) and *almost perfect* (0.81-1.00). Abbreviations: ICC = intraclass correlation coefficient; RP = retropalatal; RG = retroglossal

**Table E2A:** Pearson’s Correlations between Absolute Change in Weight and Absolute Change in Airway Size among Patients with OSA

| Airway Sizes                | Unadjusted |                  |              | Adjusted  |                  |               |
|-----------------------------|------------|------------------|--------------|-----------|------------------|---------------|
|                             | N          | rho <sup>†</sup> | p            | N         | rho <sup>‡</sup> | p             |
| RP Airway Volume            | 64         | -0.16            | 0.211        | 63        | -0.21            | 0.110         |
| RP Cross Sectional Area     | 64         | -0.21            | 0.103        | 63        | -0.27            | 0.037         |
| RP Minimum Area             | 64         | -0.03            | 0.789        | 63        | -0.05            | 0.688         |
| RP Minimum AP Distance      | <b>64</b>  | <b>0.36</b>      | <b>0.003</b> | <b>63</b> | <b>0.49</b>      | <b>0.0001</b> |
| RP Minimum Lateral Distance | 64         | -0.33            | 0.008        | <b>63</b> | <b>-0.40</b>     | <b>0.002</b>  |
| RG Airway Volume            | 62         | 0.08             | 0.535        | 61        | 0.11             | 0.434         |
| RG Cross Sectional Area     | 60         | 0.06             | 0.662        | 59        | 0.04             | 0.761         |
| RG Minimum Area             | 61         | -0.01            | 0.934        | 60        | -0.13            | 0.335         |
| RG Minimum AP Distance      | 60         | 0.26             | 0.046        | 59        | 0.24             | 0.078         |
| RG Minimum Lateral Distance | 60         | -0.03            | 0.842        | 59        | -0.04            | 0.757         |

<sup>†</sup>Unadjusted Pearson’s linear correlations; <sup>‡</sup>Partial Pearson’s correlation adjusted for age, gender, race, AHI and height. Significant values after Hochberg correction shown in **bold**. Abbreviations: RP = retropalatal; RG = retroglossal

**Table E2B:** Pearson’s Correlations between Absolute Change in Weight and Absolute Change in Soft Tissue Volumes among Patients with OSA

| Soft Tissue Volumes  | Unadjusted |                  |               | Adjusted  |                  |              |
|----------------------|------------|------------------|---------------|-----------|------------------|--------------|
|                      | N          | rho <sup>†</sup> | p             | N         | rho <sup>‡</sup> | p            |
| Combined Soft Tissue | 63         | 0.09             | 0.488         | 62        | 0.10             | 0.456        |
| Soft Palate          | 64         | -0.12            | 0.338         | 63        | -0.12            | 0.363        |
| Genioglossus         | 64         | -0.03            | 0.825         | 63        | -0.03            | 0.799        |
| Other Tongue         | 64         | -0.06            | 0.649         | 63        | -0.03            | 0.811        |
| Tongue Fat           | <b>52</b>  | <b>0.47</b>      | <b>0.0004</b> | <b>51</b> | <b>0.48</b>      | <b>0.001</b> |
| Total Tongue         | 64         | -0.06            | 0.639         | 63        | -0.05            | 0.727        |
| Epiglottis           | 63         | 0.04             | 0.737         | 62        | 0.06             | 0.632        |
| Fat Pads             | 63         | 0.06             | 0.631         | 62        | 0.04             | 0.787        |
| Pterygoid            | <b>64</b>  | <b>0.37</b>      | <b>0.002</b>  | 63        | 0.37             | 0.005        |
| RP Lateral Walls     | 64         | 0.16             | 0.212         | 63        | 0.15             | 0.267        |
| RG Lateral Walls     | 64         | 0.17             | 0.171         | 63        | 0.22             | 0.094        |
| Total Lateral Walls  | 64         | 0.24             | 0.054         | 63        | 0.28             | 0.035        |

<sup>†</sup>Unadjusted Pearson’s linear correlations; <sup>‡</sup>Partial Pearson’s correlation adjusted for age, gender, race, AHI and height. Significant values represented in **bold**. Abbreviations: RP = retropalatal; RG = retroglossal

**Table E2C:** Pearson’s Correlations between Absolute Change in Weight and Absolute Change in Abdominal Fat Measures among Patients with OSA

| Abdominal Fat Volume       | Unadjusted |                  |                   | Adjusted  |                  |                   |
|----------------------------|------------|------------------|-------------------|-----------|------------------|-------------------|
|                            | N          | rho <sup>†</sup> | p                 | N         | rho <sup>‡</sup> | p                 |
| Abdominal Total Fat        | <b>51</b>  | <b>0.57</b>      | <b>&lt;0.0001</b> | <b>50</b> | <b>0.58</b>      | <b>&lt;0.0001</b> |
| Abdominal Subcutaneous Fat | <b>51</b>  | <b>0.56</b>      | <b>&lt;0.0001</b> | <b>50</b> | <b>0.57</b>      | <b>&lt;0.0001</b> |
| Abdominal Visceral Fat     | <b>51</b>  | <b>0.49</b>      | <b>0.0003</b>     | <b>50</b> | <b>0.54</b>      | <b>0.0001</b>     |

<sup>†</sup>Unadjusted Pearson’s linear correlations; <sup>‡</sup>Partial Pearson’s correlation adjusted for age, gender, race, AHI and height. Significant values represented in **bold**.

**Table E3A: Percent Changes in Airway Size in Patients with OSA based on weight change**

| Airway Sizes                | Weight Stable/Gain |             |                | Weight Loss |                      |                | P <sub>unadj</sub> <sup>‡</sup> | P <sub>adj</sub> <sup>§</sup> |
|-----------------------------|--------------------|-------------|----------------|-------------|----------------------|----------------|---------------------------------|-------------------------------|
|                             | N                  | Mean ± SD   | p <sup>†</sup> | N           | Mean ± SD            | p <sup>†</sup> |                                 |                               |
| RP Airway Volume            | 19                 | 13.8 ± 47.0 | 0.216          | <b>45</b>   | <b>21.5 ± 51.3</b>   | <b>0.007</b>   | 0.579                           | 0.512                         |
| RP Cross Sectional Area     | 19                 | 15.4 ± 42.0 | 0.127          | <b>45</b>   | <b>24.4 ± 47.5</b>   | <b>0.001</b>   | 0.475                           | 0.374                         |
| RP Minimum Area             | 19                 | 17.8 ± 58.1 | 0.197          | <b>45</b>   | <b>55.9 ± 116.7</b>  | <b>0.003</b>   | 0.088                           | 0.158                         |
| RP Minimum AP Distance      | 19                 | 9.7 ± 42.6  | 0.332          | 45          | -3.1 ± 77.3          | 0.789          | 0.399                           | 0.426                         |
| RP Minimum Lateral Distance | 19                 | 1.1 ± 30.6  | 0.879          | <b>45</b>   | <b>33.8 ± 65.6</b>   | <b>0.001</b>   | 0.009                           | 0.020                         |
| RG Airway Volume            | 17                 | 19.6 ± 29.6 | 0.015          | 45          | 7.8 ± 35.7           | 0.149          | 0.230                           | 0.317                         |
| RG Cross Sectional Area     | 17                 | 19.6 ± 36.4 | 0.042          | 43          | 6.3 ± 28.7           | 0.160          | 0.140                           | 0.197                         |
| RG Minimum Area             | 17                 | 21.7 ± 57.1 | 0.136          | <b>44</b>   | <b>424.6 ± 778.8</b> | <b>0.001</b>   | <b>0.001</b>                    | 0.023                         |
| RG Minimum AP Distance      | 17                 | 8.1 ± 40.4  | 0.421          | 43          | 7.0 ± 48.2           | 0.343          | 0.938                           | 0.998                         |
| RG Minimum Lateral Distance | 17                 | 13.3 ± 44.3 | 0.233          | 43          | 16.3 ± 54.4          | 0.055          | 0.840                           | 0.668                         |

<sup>†</sup>p-value from paired T-test examining significance of within group change; <sup>‡</sup>p-value from T-test comparing changes between weight loss and weight stable/gain; <sup>§</sup>p-value adjusted for age, sex, race, AHI and height. Significant values after Hochberg correction represented in **bold**. Abbreviations: RP = retropalatal; RG = retroglossal

**Table E3B: Percent Changes in Soft Tissue Volumes in Patients with OSA based on weight change**

| Soft Tissue Volumes  | Weight Stable/Gain |              |                | Weight Loss |                     |                   | P <sub>unadj</sub> <sup>‡</sup> | P <sub>adj</sub> <sup>§</sup> |
|----------------------|--------------------|--------------|----------------|-------------|---------------------|-------------------|---------------------------------|-------------------------------|
|                      | N                  | Mean ± SD    | p <sup>†</sup> | N           | Mean ± SD           | p <sup>†</sup>    |                                 |                               |
| Combined Soft Tissue | 19                 | -3.3 ± 6.3   | 0.035          | <b>44</b>   | <b>-7.4 ± 9.0</b>   | <b>&lt;0.0001</b> | 0.077                           | 0.057                         |
| Soft Palate          | 19                 | -8.6 ± 22.7  | 0.115          | 45          | -0.1 ± 24.0         | 0.986             | 0.190                           | 0.197                         |
| Genioglossus         | 19                 | -3.0 ± 7.3   | 0.092          | <b>45</b>   | <b>-5.1 ± 10.0</b>  | <b>0.001</b>      | 0.409                           | 0.318                         |
| Other Tongue         | 19                 | -2.4 ± 25.0  | 0.682          | 45          | -0.8 ± 28.4         | 0.859             | 0.828                           | 0.951                         |
| Tongue Fat           | 13                 | 6.8 ± 11.5   | 0.055          | <b>39</b>   | <b>-19.9 ± 17.8</b> | <b>&lt;0.0001</b> | <b>&lt;0.0001</b>               | <b>&lt;0.0001</b>             |
| Total Tongue         | 19                 | -3.7 ± 6.5   | 0.023          | <b>45</b>   | <b>-4.6 ± 11.4</b>  | <b>0.009</b>      | 0.692                           | 0.577                         |
| Epiglottis           | 19                 | 14.7 ± 38.2  | 0.111          | 44          | 3.6 ± 40.1          | 0.557             | 0.309                           | 0.211                         |
| Fat Pads             | 19                 | -15.9 ± 26.0 | 0.016          | <b>44</b>   | <b>-28.3 ± 22.2</b> | <b>&lt;0.0001</b> | 0.058                           | 0.078                         |
| Pterygoid            | 19                 | 1.5 ± 16.9   | 0.704          | <b>45</b>   | <b>-12.0 ± 13.4</b> | <b>&lt;0.0001</b> | <b>0.001</b>                    | <b>0.004</b>                  |
| RP Lateral Walls     | 19                 | -2.6 ± 16.4  | 0.504          | <b>45</b>   | <b>-11.9 ± 15.1</b> | <b>&lt;0.0001</b> | 0.032                           | 0.022                         |
| RG Lateral Walls     | 19                 | 14.3 ± 22.0  | 0.011          | 45          | -2.8 ± 24.2         | 0.441             | 0.010                           | 0.020                         |
| Total Lateral Walls  | 19                 | 3.4 ± 14.8   | 0.333          | <b>45</b>   | <b>-9.3 ± 11.8</b>  | <b>&lt;0.0001</b> | <b>0.001</b>                    | <b>0.001</b>                  |

<sup>†</sup>p-value from paired T-test examining significance of within group change; <sup>‡</sup>p-value from T-test comparing changes between weight loss and weight stable/gain; <sup>§</sup>p-value adjusted for age, sex, race, AHI and height. Significant values after Hochberg correction represented in **bold**. Abbreviations: RP = retropalatal; RG = retroglossal

**Table E3C: Percent Changes in Abdominal Fat Volumes in Patients with OSA based on weight change**

| Abdominal Fat Volume       | Weight Stable/Gain |             |                | Weight Loss |                     |                   | P <sub>unadj</sub> <sup>‡</sup> | P <sub>adj</sub> <sup>§</sup> |
|----------------------------|--------------------|-------------|----------------|-------------|---------------------|-------------------|---------------------------------|-------------------------------|
|                            | N                  | Mean ± SD   | p <sup>†</sup> | N           | Mean ± SD           | p <sup>†</sup>    |                                 |                               |
| Abdominal Total Fat        | 15                 | -0.1 ± 38.4 | 0.991          | <b>36</b>   | <b>-21.1 ± 17.8</b> | <b>&lt;0.0001</b> | 0.059                           | <b>0.013</b>                  |
| Abdominal Subcutaneous Fat | 15                 | -1.4 ± 36.0 | 0.883          | <b>36</b>   | <b>-19.4 ± 18.2</b> | <b>&lt;0.0001</b> | 0.084                           | <b>0.024</b>                  |
| Abdominal Visceral Fat     | 15                 | 9.5 ± 64.4  | 0.576          | <b>36</b>   | <b>-25.9 ± 21.6</b> | <b>&lt;0.0001</b> | 0.055                           | <b>0.007</b>                  |

<sup>†</sup>p-value from paired T-test examining significance of within group change; <sup>‡</sup>p-value from T-test comparing changes between weight loss and weight stable/gain; <sup>§</sup>p-value adjusted for age, sex, race, AHI and height. Significant values after Hochberg correction represented in **bold**.

**Table E4A: Absolute Changes in Airway Size in Patients with OSA based on weight change**

| Airway Sizes                             | Weight Stable/Gain |                 |                | Weight Loss |                     |                | P <sub>unadj</sub> <sup>‡</sup> | P <sub>adj</sub> <sup>§</sup> |
|------------------------------------------|--------------------|-----------------|----------------|-------------|---------------------|----------------|---------------------------------|-------------------------------|
|                                          | N                  | Mean ± SD       | p <sup>†</sup> | N           | Mean ± SD           | p <sup>†</sup> |                                 |                               |
| RP Airway Volume, mm <sup>3</sup>        | 19                 | 103.8 ± 1773.5  | 0.802          | 45          | 377.2 ± 1434.5      | 0.085          | 0.519                           | 0.754                         |
| RP Cross Sectional Area, mm <sup>2</sup> | 19                 | 32.0 ± 134.3    | 0.312          | 45          | 53.1 ± 125.6        | 0.007          | 0.551                           | 0.632                         |
| RP Minimum Area, mm <sup>2</sup>         | 19                 | 3.3 ± 23.1      | 0.547          | 45          | 13.4 ± 39.1         | 0.027          | 0.205                           | 0.232                         |
| RP Minimum AP Distance, mm               | 19                 | 0.47 ± 3.23     | 0.533          | <b>45</b>   | <b>-3.54 ± 7.52</b> | <b>0.003</b>   | <b>0.004</b>                    | 0.022                         |
| RP Minimum Lateral Distance, mm          | 19                 | -0.26 ± 2.42    | 0.642          | <b>45</b>   | <b>2.24 ± 4.79</b>  | <b>0.003</b>   | 0.008                           | 0.033                         |
| RG Airway Volume, mm <sup>3</sup>        | 17                 | 1030.8 ± 1823.3 | 0.033          | 45          | -25.9 ± 2395.0      | 0.943          | 0.105                           | 0.286                         |
| RG Cross Sectional Area, mm <sup>2</sup> | 17                 | 88.7 ± 242.7    | 0.151          | 43          | 18.5 ± 195.6        | 0.539          | 0.247                           | 0.379                         |
| RG Minimum Area, mm <sup>2</sup>         | 17                 | 16.9 ± 81.3     | 0.404          | 44          | 39.6 ± 118.6        | 0.032          | 0.471                           | 0.848                         |
| RG Minimum AP Distance, mm               | 17                 | 0.26 ± 4.42     | 0.813          | 43          | -0.52 ± 4.49        | 0.456          | 0.548                           | 0.220                         |
| RG Minimum Lateral Distance, mm          | 17                 | 0.23 ± 5.57     | 0.866          | 43          | 0.72 ± 6.10         | 0.443          | 0.776                           | 0.944                         |

<sup>†</sup>p-value from paired T-test examining significance of within group change; <sup>‡</sup>p-value from T-test comparing changes between weight loss and weight stable/gain; <sup>§</sup>p-value adjusted for age, sex, race, AHI, height and baseline airway size. Significant values after Hochberg correction represented in **bold**. Abbreviations: RP = retropalatal; RG = retroglossal

**Table E4B: Absolute Changes in Soft Tissue Volumes in Patients with OSA based on weight change**

| Soft Tissue Volumes (mm <sup>3</sup> ) | Weight Stable/Gain |                   |                | Weight Loss |                           |                   | P <sub>unadj</sub> <sup>‡</sup> | P <sub>adj</sub> <sup>§</sup> |
|----------------------------------------|--------------------|-------------------|----------------|-------------|---------------------------|-------------------|---------------------------------|-------------------------------|
|                                        | N                  | Mean ± SD         | p <sup>†</sup> | N           | Mean ± SD                 | p <sup>†</sup>    |                                 |                               |
| Combined Soft Tissue                   | 19                 | -6959.9 ± 11999.6 | 0.021          | <b>44</b>   | <b>-15100.3 ± 19816.8</b> | <b>&lt;0.0001</b> | 0.050                           | 0.054                         |
| Soft Palate                            | 19                 | -894.0 ± 1866.5   | 0.051          | 45          | -191.4 ± 1746.8           | 0.466             | 0.155                           | 0.381                         |
| Genioglossus                           | 19                 | -3014.8 ± 7137.1  | 0.082          | <b>45</b>   | <b>-5284.8 ± 10333.8</b>  | <b>0.001</b>      | 0.387                           | 0.306                         |
| Other Tongue                           | 19                 | -2286.4 ± 9895.2  | 0.327          | 45          | -1197.6 ± 10204.6         | 0.435             | 0.695                           | 0.444                         |
| Tongue Fat                             | 13                 | 1864.4 ± 3173.6   | 0.056          | <b>39</b>   | <b>-5536.7 ± 5110.1</b>   | <b>&lt;0.0001</b> | <b>&lt;0.0001</b>               | <b>0.0001</b>                 |
| Total Tongue                           | 19                 | -5301.2 ± 8809.8  | 0.017          | <b>45</b>   | <b>-6482.4 ± 16082.5</b>  | <b>0.010</b>      | 0.708                           | 0.512                         |
| Epiglottis                             | 19                 | 124.3 ± 544.3     | 0.333          | 44          | -33.5 ± 613.7             | 0.719             | 0.337                           | 0.028                         |
| Fat Pads                               | 19                 | -1504.5 ± 2276.3  | 0.010          | <b>44</b>   | <b>-2219.8 ± 1927.1</b>   | <b>&lt;0.0001</b> | 0.206                           | <b>0.004</b>                  |
| Pterygoid                              | 19                 | 232.8 ± 4043.8    | 0.805          | <b>45</b>   | <b>-3149.4 ± 3444.5</b>   | <b>&lt;0.0001</b> | <b>0.001</b>                    | <b>0.0002</b>                 |
| RP Lateral Walls                       | 19                 | -684.4 ± 2108.1   | 0.174          | <b>45</b>   | <b>-1795.2 ± 2381.8</b>   | <b>&lt;0.0001</b> | 0.083                           | 0.016                         |
| RG Lateral Walls                       | 19                 | 1067.2 ± 2065.4   | 0.037          | 45          | -807.4 ± 3044.4           | 0.082             | 0.017                           | 0.040                         |
| Total Lateral Walls                    | 19                 | 382.8 ± 2808.7    | 0.560          | <b>45</b>   | <b>-2602.7 ± 3566.0</b>   | <b>&lt;0.0001</b> | <b>0.002</b>                    | <b>0.001</b>                  |

<sup>†</sup>p-value from paired T-test examining significance of within group change; <sup>‡</sup>p-value from T-test comparing changes between weight loss and weight stable/gain; <sup>§</sup>p-value adjusted for age, sex, race, AHI, height and baseline soft tissue volume. Significant values after Hochberg correction represented in **bold**. Abbreviations: RP = retropalatal; RG = retroglossal

**Table E4C: Absolute Changes in Abdominal Fat Volumes in Patients with OSA based on weight change**

| Abdominal Fat Volume (mm <sup>3</sup> ) | Weight Stable/Gain |                    |                | Weight Loss |                           |                   | P <sub>unadj</sub> <sup>‡</sup> | P <sub>adj</sub> <sup>§</sup> |
|-----------------------------------------|--------------------|--------------------|----------------|-------------|---------------------------|-------------------|---------------------------------|-------------------------------|
|                                         | N                  | Mean ± SD          | p <sup>†</sup> | N           | Mean ± SD                 | p <sup>†</sup>    |                                 |                               |
| Abdominal Total Fat                     | 15                 | -1337194 ± 6041271 | 0.406          | <b>36</b>   | <b>-3825576 ± 4108429</b> | <b>&lt;0.0001</b> | 0.094                           | <b>0.002</b>                  |
| Abdominal Subcutaneous Fat              | 15                 | -1019828 ± 4808678 | 0.425          | <b>36</b>   | <b>-2898336 ± 3418169</b> | <b>&lt;0.0001</b> | 0.120                           | <b>0.006</b>                  |
| Abdominal Visceral Fat                  | 15                 | -317367 ± 1441512  | 0.408          | <b>36</b>   | <b>-927240 ± 958480</b>   | <b>&lt;0.0001</b> | 0.082                           | <b>0.001</b>                  |

<sup>†</sup>p-value from paired T-test examining significance of within group change; <sup>‡</sup>p-value from T-test comparing changes between weight loss and weight stable/gain; <sup>§</sup>p-value adjusted for age, sex, race, AHI, height and baseline abdominal fat volume. Significant values after Hochberg correction represented in **bold**.

**Table E5A:** Correlations between Absolute Change in AHI and Absolute Change in Airway Size among Patients with OSA

| Airway Sizes                | Unadjusted |                  |       | Adjusted Results             |                  |       |                                           |                  |       |
|-----------------------------|------------|------------------|-------|------------------------------|------------------|-------|-------------------------------------------|------------------|-------|
|                             |            |                  |       | Covariates Only <sup>†</sup> |                  |       | Covariates and Weight Change <sup>‡</sup> |                  |       |
|                             | N          | rho <sup>†</sup> | p     | N                            | rho <sup>‡</sup> | p     | N                                         | rho <sup>§</sup> | p     |
| RP Airway Volume            | 63         | 0.15             | 0.241 | 62                           | 0.08             | 0.576 | 62                                        | 0.24             | 0.077 |
| RP Cross Sectional Area     | 63         | 0.12             | 0.347 | 62                           | 0.05             | 0.737 | 62                                        | 0.24             | 0.067 |
| RP Minimum Area             | 63         | -0.04            | 0.726 | 62                           | -0.05            | 0.712 | 62                                        | -0.03            | 0.833 |
| RP Minimum AP Distance      | 63         | 0.26             | 0.038 | 62                           | 0.30             | 0.022 | 62                                        | 0.04             | 0.762 |
| RP Minimum Lateral Distance | 63         | -0.17            | 0.173 | 62                           | -0.18            | 0.183 | 62                                        | 0.06             | 0.681 |
| RG Airway Volume            | 61         | -0.12            | 0.371 | 60                           | -0.14            | 0.292 | 60                                        | -0.23            | 0.090 |
| RG Cross Sectional Area     | 59         | 0.02             | 0.867 | 58                           | 0.00             | 0.973 | 58                                        | -0.02            | 0.873 |
| RG Minimum Area             | 60         | -0.06            | 0.657 | 59                           | -0.07            | 0.601 | 59                                        | 0.00             | 0.977 |
| RG Minimum AP Distance      | 59         | 0.12             | 0.347 | 58                           | 0.16             | 0.249 | 58                                        | 0.01             | 0.944 |
| RG Minimum Lateral Distance | 59         | -0.10            | 0.429 | 58                           | -0.23            | 0.102 | 58                                        | -0.22            | 0.107 |

<sup>†</sup>Unadjusted Pearson's linear correlation; <sup>‡</sup>Partial Pearson's correlation adjusted for age, gender, race and height; <sup>§</sup>Partial Pearson's correlation adjusted for age, gender, race, height and percent change in weight. Significant values after Hochberg correction represented in **bold**. Abbreviations: RP = retropalatal; RG = retroglossal

**Table E5B:** Correlations between Absolute Change in AHI and Absolute Change in Soft Tissues among Patients with OSA

| Soft Tissue Volumes  | Unadjusted |                  |              | Adjusted Results             |                  |              |                                           |                  |       |
|----------------------|------------|------------------|--------------|------------------------------|------------------|--------------|-------------------------------------------|------------------|-------|
|                      |            |                  |              | Covariates Only <sup>†</sup> |                  |              | Covariates and Weight Change <sup>‡</sup> |                  |       |
|                      | N          | rho <sup>†</sup> | p            | N                            | rho <sup>‡</sup> | p            | N                                         | rho <sup>§</sup> | p     |
| Combined Soft Tissue | 62         | 0.09             | 0.482        | 61                           | 0.05             | 0.698        | 61                                        | 0.01             | 0.913 |
| Soft Palate          | 63         | -0.06            | 0.625        | 62                           | -0.08            | 0.554        | 62                                        | -0.01            | 0.944 |
| Genioglossus         | 63         | 0.03             | 0.794        | 62                           | 0.05             | 0.735        | 62                                        | 0.09             | 0.507 |
| Other Tongue         | 63         | -0.04            | 0.734        | 62                           | -0.07            | 0.618        | 62                                        | -0.05            | 0.721 |
| Tongue Fat           | <b>51</b>  | <b>0.47</b>      | <b>0.001</b> | <b>50</b>                    | <b>0.47</b>      | <b>0.001</b> | 50                                        | 0.29             | 0.057 |
| Total Tongue         | 63         | -0.01            | 0.947        | 62                           | -0.02            | 0.901        | 62                                        | 0.03             | 0.846 |
| Epiglottis           | 62         | 0.13             | 0.316        | 61                           | 0.08             | 0.539        | 61                                        | 0.06             | 0.673 |
| Fat Pads             | 62         | 0.09             | 0.501        | 61                           | 0.09             | 0.483        | 61                                        | 0.09             | 0.505 |
| Pterygoid            | 63         | 0.28             | 0.024        | 62                           | 0.19             | 0.148        | 62                                        | -0.02            | 0.903 |
| RP Lateral Walls     | 63         | 0.30             | 0.018        | 62                           | 0.25             | 0.061        | 62                                        | 0.21             | 0.120 |
| RG Lateral Walls     | 63         | -0.05            | 0.697        | 62                           | -0.10            | 0.448        | 62                                        | -0.25            | 0.058 |
| Total Lateral Walls  | 63         | 0.15             | 0.233        | 62                           | 0.07             | 0.594        | 62                                        | -0.08            | 0.574 |

<sup>†</sup>Unadjusted Pearson's linear correlation; <sup>‡</sup>Partial Pearson's correlation adjusted for age, gender, race and height; <sup>§</sup>Partial Pearson's correlation adjusted for age, gender, race, height and percent change in weight. Significant values after Hochberg correction represented in **bold**. Abbreviations: RP = retropalatal; RG = retroglossal



**Table E5C:** Correlations between Absolute Change in AHI and Absolute Change in Abdominal Fat Measures among Patients with OSA

| Abdominal Fat Volume       | Unadjusted |                  |              | Adjusted Results |                  |              |                              |                  |       |
|----------------------------|------------|------------------|--------------|------------------|------------------|--------------|------------------------------|------------------|-------|
|                            |            |                  |              | Covariates Only  |                  |              | Covariates and Weight Change |                  |       |
|                            | N          | rho <sup>†</sup> | p            | N                | rho <sup>‡</sup> | p            | N                            | rho <sup>§</sup> | p     |
| Abdominal Total Fat        | 50         | 0.31             | 0.029        | <b>49</b>        | <b>0.34</b>      | <b>0.021</b> | 49                           | 0.03             | 0.829 |
| Abdominal Subcutaneous Fat | 50         | 0.28             | 0.051        | <b>49</b>        | <b>0.33</b>      | <b>0.027</b> | 49                           | 0.02             | 0.880 |
| Abdominal Visceral Fat     | <b>50</b>  | <b>0.35</b>      | <b>0.012</b> | <b>49</b>        | <b>0.34</b>      | <b>0.024</b> | 49                           | 0.06             | 0.702 |

<sup>†</sup>Unadjusted Pearson's linear correlation; <sup>‡</sup>Partial Pearson's correlation adjusted for age, gender, race and height; <sup>§</sup>Partial Pearson's correlation adjusted for age, gender, race, height and change in weight. Significant values after Hochberg correction represented in **bold**.

**Table E6A:** Partial Pearson's correlations between Percent Change in Positional AHI and Percent Change in Airway Size among Patients with OSA<sup>†</sup>

| Airway Sizes                | Supine AHI      |                  |       |                              |                  |       | Non-Supine AHI  |                  |       |                              |                  |       |
|-----------------------------|-----------------|------------------|-------|------------------------------|------------------|-------|-----------------|------------------|-------|------------------------------|------------------|-------|
|                             | Covariates Only |                  |       | Covariates and Weight Change |                  |       | Covariates Only |                  |       | Covariates and Weight Change |                  |       |
|                             | N               | rho <sup>‡</sup> | p     | N                            | rho <sup>§</sup> | p     | N               | rho <sup>‡</sup> | p     | N                            | rho <sup>§</sup> | p     |
| RP Airway Volume            | 36              | 0.13             | 0.490 | 36                           | 0.10             | 0.610 | 47              | 0.00             | 0.988 | 47                           | 0.03             | 0.831 |
| RP Cross Sectional Area     | 36              | 0.11             | 0.548 | 36                           | 0.06             | 0.734 | 47              | -0.05            | 0.771 | 47                           | 0.03             | 0.832 |
| RP Minimum Area             | 36              | -0.01            | 0.958 | 36                           | -0.00            | 0.997 | 47              | -0.07            | 0.669 | 47                           | -0.08            | 0.593 |
| RP Minimum AP Distance      | 36              | -0.11            | 0.538 | 36                           | -0.06            | 0.746 | 47              | 0.18             | 0.236 | 47                           | -0.02            | 0.923 |
| RP Minimum Lateral Distance | 36              | 0.08             | 0.652 | 36                           | 0.04             | 0.814 | 47              | -0.20            | 0.196 | 47                           | 0.06             | 0.727 |
| RG Airway Volume            | 35              | -0.09            | 0.638 | 35                           | -0.10            | 0.583 | 45              | 0.12             | 0.463 | 45                           | 0.06             | 0.696 |
| RG Cross Sectional Area     | 33              | -0.02            | 0.901 | 33                           | -0.04            | 0.826 | 43              | 0.33             | 0.041 | 43                           | 0.25             | 0.138 |
| RG Minimum Area             | 34              | 0.30             | 0.111 | 34                           | 0.22             | 0.246 | 44              | -0.31            | 0.055 | 44                           | 0.15             | 0.364 |
| RG Minimum AP Distance      | 33              | -0.04            | 0.817 | 33                           | -0.03            | 0.879 | 44              | 0.22             | 0.166 | 44                           | 0.12             | 0.457 |
| RG Minimum Lateral Distance | 33              | -0.18            | 0.337 | 33                           | -0.19            | 0.339 | 44              | 0.09             | 0.584 | 44                           | 0.14             | 0.387 |

<sup>†</sup>Analyses restricted to subsets of patients with specific positional AHI  $\geq 5$  events/hour at baseline; <sup>‡</sup>Partial Pearson's correlation adjusted for age, gender, race and height; <sup>§</sup>Partial Pearson's correlation adjusted for age, gender, race, height and percent change in weight. Significant values after Hochberg correction shown in **bold**. Abbreviations: RP = retropalatal; RG = retroglottal

**Table E6B:** Partial Pearson’s Correlations between Percent Change in Positional AHI and Percent Change in Soft Tissues among Patients with OSA

| Soft Tissue Volumes  | Supine AHI      |                  |       |                              |                  |       | Non-Supine AHI  |                  |               |                              |                  |       |
|----------------------|-----------------|------------------|-------|------------------------------|------------------|-------|-----------------|------------------|---------------|------------------------------|------------------|-------|
|                      | Covariates Only |                  |       | Covariates and Weight Change |                  |       | Covariates Only |                  |               | Covariates and Weight Change |                  |       |
|                      | N               | rho <sup>‡</sup> | p     | N                            | rho <sup>§</sup> | p     | N               | rho <sup>‡</sup> | p             | N                            | rho <sup>§</sup> | p     |
| Combined Soft Tissue | 35              | -0.11            | 0.568 | 35                           | -0.10            | 0.614 | 47              | 0.16             | 0.307         | 47                           | -0.11            | 0.498 |
| Soft Palate          | 36              | 0.22             | 0.220 | 36                           | 0.21             | 0.261 | 47              | -0.11            | 0.482         | 47                           | -0.15            | 0.350 |
| Genioglossus         | 36              | -0.18            | 0.334 | 36                           | -0.18            | 0.320 | 47              | 0.08             | 0.608         | 47                           | -0.01            | 0.956 |
| Other Tongue         | 36              | -0.02            | 0.914 | 36                           | -0.02            | 0.932 | 47              | 0.01             | 0.927         | 47                           | -0.11            | 0.473 |
| Tongue Fat           | 31              | 0.22             | 0.260 | 31                           | 0.36             | 0.070 | <b>36</b>       | <b>0.59</b>      | <b>0.0004</b> | 36                           | 0.23             | 0.206 |
| Total Tongue         | 36              | -0.12            | 0.520 | 36                           | -0.13            | 0.493 | 47              | 0.11             | 0.503         | 47                           | -0.07            | 0.654 |
| Epiglottis           | 35              | -0.00            | 0.987 | 35                           | 0.01             | 0.955 | 47              | 0.02             | 0.878         | 47                           | 0.19             | 0.233 |
| Fat Pads             | 35              | -0.24            | 0.197 | 35                           | -0.26            | 0.160 | 47              | 0.20             | 0.194         | 47                           | 0.07             | 0.668 |
| Pterygoid            | 36              | -0.06            | 0.734 | 36                           | 0.00             | 0.980 | 47              | 0.10             | 0.514         | 47                           | -0.11            | 0.483 |
| RP Lateral Walls     | 36              | 0.04             | 0.813 | 36                           | 0.08             | 0.653 | 47              | 0.28             | 0.071         | 47                           | 0.15             | 0.358 |
| RG Lateral Walls     | 36              | -0.01            | 0.939 | 36                           | 0.00             | 0.982 | 47              | 0.01             | 0.968         | 47                           | -0.21            | 0.186 |
| Total Lateral Walls  | 36              | 0.02             | 0.919 | 36                           | 0.08             | 0.687 | 47              | 0.18             | 0.251         | 47                           | -0.07            | 0.669 |

<sup>‡</sup>Analyses restricted to subsets of patients with specific positional AHI ≥ 5 events/hour at baseline; <sup>‡</sup>Partial Pearson’s correlation adjusted for age, gender, race and height; <sup>§</sup>Partial Pearson’s correlation adjusted for age, gender, race, height and percent change in weight. Significant values after Hochberg correction shown in **bold**. Abbreviations: RP = retropalatal; RG = retroglossal

**Table E6C:** Partial Pearson’s Correlations between Percent Change in Positional AHI and Percent Change in Abdominal Fat Measures among Patients with OSA

| Abdominal Fat Volume       | Supine AHI      |                  |       |                              |                  |       | Non-Supine AHI  |                  |       |                              |                  |       |
|----------------------------|-----------------|------------------|-------|------------------------------|------------------|-------|-----------------|------------------|-------|------------------------------|------------------|-------|
|                            | Covariates Only |                  |       | Covariates and Weight Change |                  |       | Covariates Only |                  |       | Covariates and Weight Change |                  |       |
|                            | N               | rho <sup>‡</sup> | p     | N                            | rho <sup>§</sup> | p     | N               | rho <sup>‡</sup> | p     | N                            | rho <sup>§</sup> | p     |
| Abdominal Total Fat        | 25              | 0.38             | 0.090 | 25                           | -0.02            | 0.946 | 39              | 0.37             | 0.031 | 39                           | -0.03            | 0.874 |
| Abdominal Subcutaneous Fat | 25              | 0.34             | 0.132 | 25                           | 0.02             | 0.939 | 39              | 0.36             | 0.032 | 39                           | 0.00             | 0.988 |
| Abdominal Visceral Fat     | 25              | 0.39             | 0.077 | 25                           | -0.14            | 0.566 | 39              | 0.29             | 0.089 | 39                           | -0.09            | 0.595 |

<sup>‡</sup>Analyses restricted to subsets of patients with specific positional AHI ≥ 5 events/hour at baseline; <sup>‡</sup>Partial Pearson’s correlation adjusted for age, gender, race and height; <sup>§</sup>Partial Pearson’s correlation adjusted for age, gender, race, height and percent change in weight. Significant values after Hochberg correction shown in **bold**. Abbreviations: RP = retropalatal; RG = retroglossal

## SUPPLEMENTAL REFERENCES

- E1. Kim AM, Keenan BT, Jackson N, Chan EL, Staley B, Poptani H, Torigian DA, Pack AI, Schwab RJ. Tongue fat and its relationship to obstructive sleep apnea. *Sleep* 2014; 37: 1639-1648.
- E2. The Diabetes Prevention Program (DPP). *Description of lifestyle intervention* 2002; 25: 2165-2171.
- E3. Schwab RJ, Pasirstein M, Pierson R, Mackley A, Hachadoorian R, Arens R, Maislin G, Pack AI. Identification of upper airway anatomic risk factors for obstructive sleep apnea with volumetric magnetic resonance imaging. *Am J Respir Crit Care Med* 2003; 168: 522-530.
- E4. Maislin G, Ahmed MM, Gooneratne N, Thorne-Fitzgerald M, Kim C, Teff K, Arnardottir ES, Benediktsdottir B, Einarsdottir H, Juliusson S, Pack AI, Gislason T, Schwab RJ. Single slice vs. volumetric MR assessment of visceral adipose tissue: reliability and validity among the overweight and obese. *Obesity (Silver Spring, Md)* 2012; 20: 2124-2132.
- E5. Welch KC, Foster GD, Ritter CT, Wadden TA, Arens R, Maislin G, Schwab RJ. A novel volumetric magnetic resonance imaging paradigm to study upper airway anatomy. *Sleep* 2002; 25: 532-542.
- E6. Schwab RJ, Pasirstein M, Pierson R, Mackley A, Hachadoorian R, Arens R, Maislin G, Pack AI. Identification of upper airway anatomic risk factors for obstructive sleep apnea with volumetric magnetic resonance imaging. *Am J Respir Crit Care Med* 2003; 168: 522-530.
- E7. Landis JR, Koch GG. The measurement of observer agreement for categorical data. *Biometrics* 1977; 33: 159-174.
- E8. Efron B, Tibshirani R. *An Introduction to the Bootstrap*. Chapman and Hall/CRC Press; 1994.
- E9. Arnardottir ES, Maislin G, Schwab RJ, Staley B, Benediktsdottir B, Olafsson I, Juliusson S, Romer M, Gislason T, Pack AI. The interaction of obstructive sleep apnea and obesity on the inflammatory markers C-reactive protein and interleukin-6: the icelandic sleep apnea cohort. *Sleep* 2012; 35: 921-932.
- E10. Preacher KJ, Hayes AF. Asymptotic and resampling strategies for assessing and comparing indirect effects in multiple mediator models. *Behav Res Methods* 2008; 40: 879-891.
- E11. Hayes AF. *PROCESS : A Versatile Computational Tool for Observed Variable Mediation , Moderation , and Conditional Process Modeling 1*. 2012.
- E12. Mallinckrodt B. *Advances in testing the statistical significance of mediation effects*. 2006.
- E13. Preacher KJ, Hayes AF. SPSS and SAS procedures for estimating indirect effects in simple mediation models. *Behavior research methods, instruments, & computers : a journal of the Psychonomic Society, Inc* 2004; 36: 717-731.
- E14. Hochberg Y. A sharper Bonferroni procedure for multiple tests of significance. *Biometrika* 1988; 75: 800-802.
- E15. Hochberg Y, Benjamini Y. More powerful procedures for multiple significance testing. *Stat Med* 1990; 9: 811-818.
- E16. Huang Y, Hsu JC. Hochberg's Step-up Method: Cutting Corners off Holm's Step-down Method. *Biometrika* 2007; 94: 965-975.
- E17. Cohen J. *Statistical Power Analysis for the Behavioral Sciences*, 2nd Ed. Hillsdale: Lawrence Erlbaum Associates; 1988.
